# Supplementary material for: Self-Assembly of a Novel Pentapeptide into Hydrogelated Dendritic Architecture: Synthesis, Properties, Molecular Docking and Prospective Applications
Source: MDPI journal article supplement (doi:10.3390/gels10020086), 2024-01-23
Supplement: s1 [file s1]

## Supplementary materials

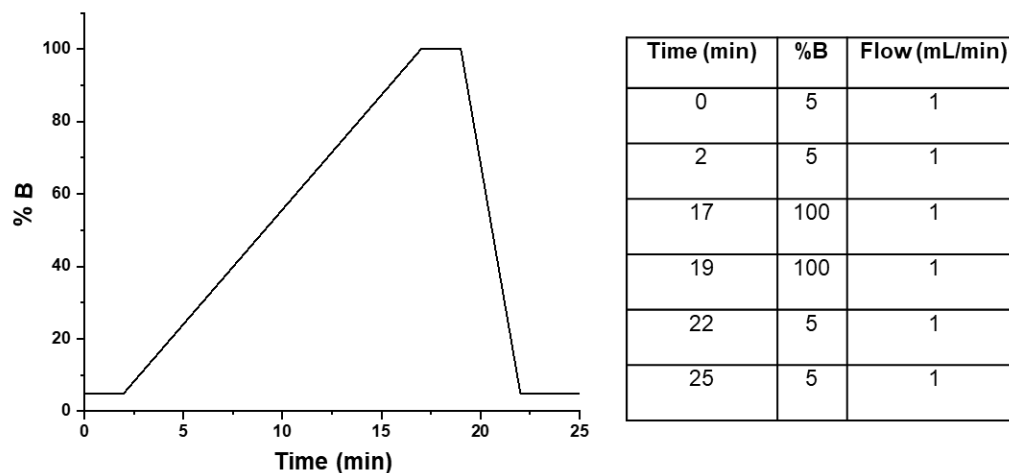

**Figure S1.** The gradient protocol used in HPLC analysis.

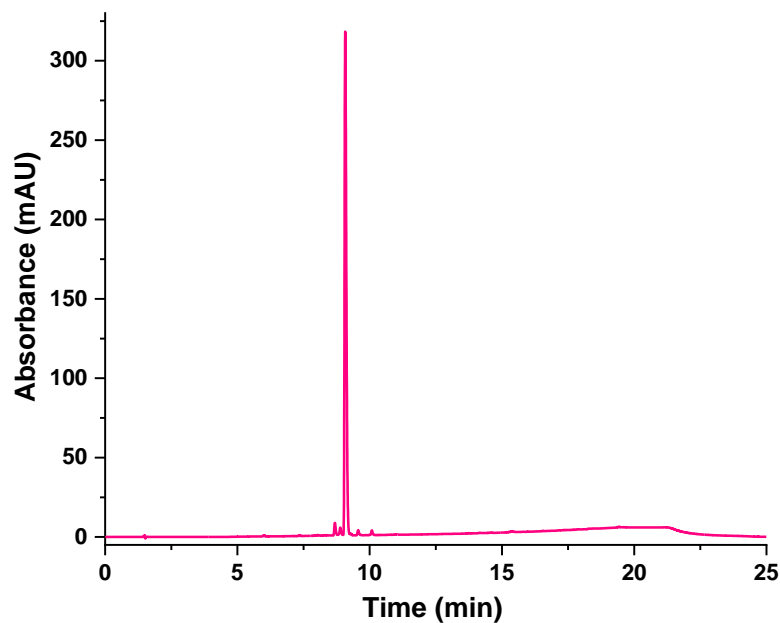

**Figure S2.** HPLC chromatogram of the FEYNF-NH<sub>2</sub> peptide following purification through solid-phase extraction, revealing a calculated purity of 99.54%. The chromatogram was generated using an injection volume of 5  $\mu$ L, and the data were recorded at a detection wavelength of 215 nm. The observed peak patterns and their intensities affirm the successful purification, highlighting the peptide's exceptional purity achieved through the solid-phase extraction process.

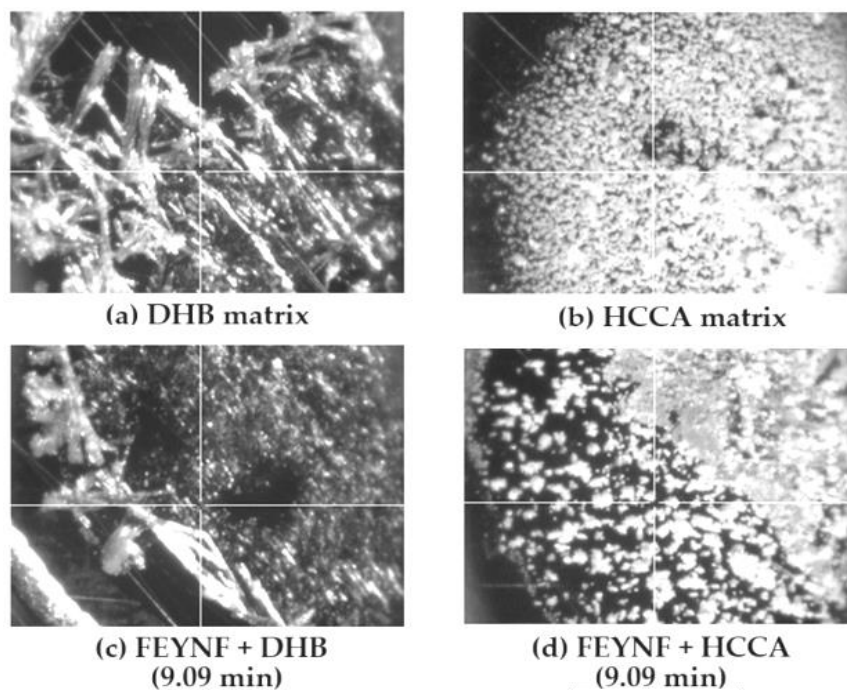

**Figure S3.** Visualization of the crystals formed by the HCCA and DHB matrices (a,b) and the co-crystals with the FEYNF samples on the target (c,d). Images obtained by means of the camera equipped with the MALDI-ToF mass spectrometer. Retention times are reported based on HPLC analysis.

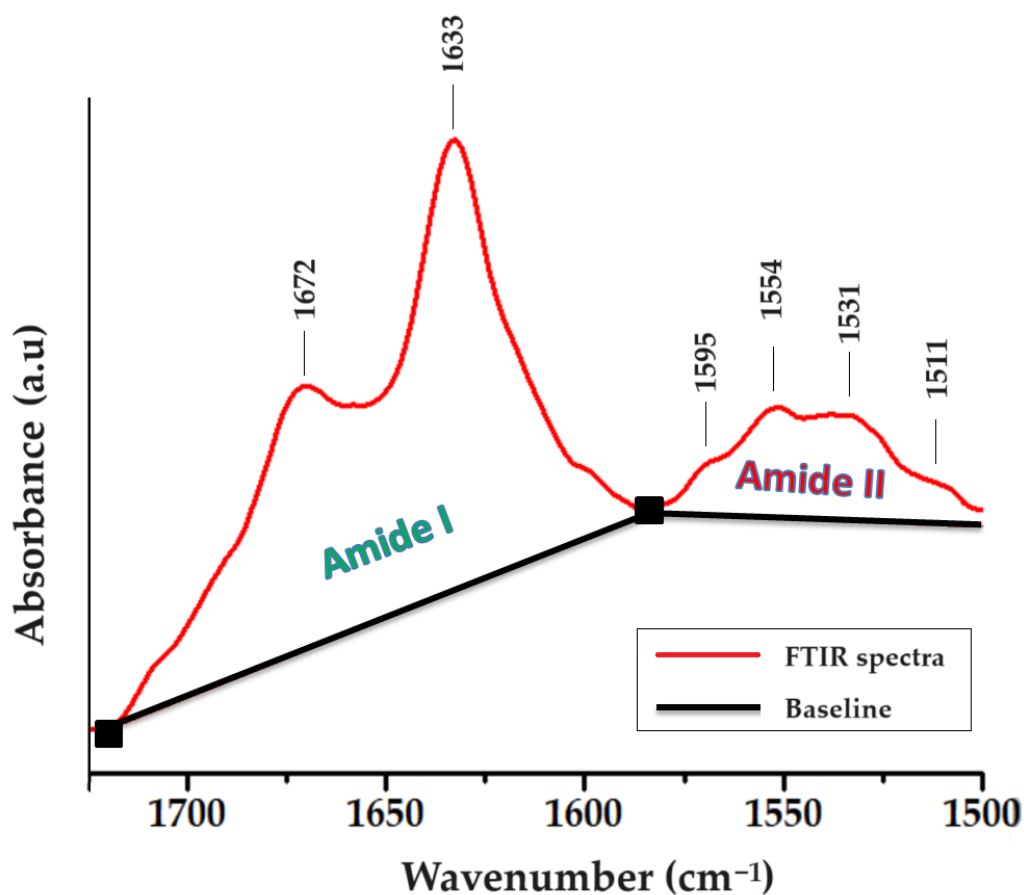

**Figure S4.** FTIR spectrum of FEYNF-NH<sub>2</sub> peptide evidencing the amide I-amide II spectral range and the baseline applied for data processing.

**Table S1.** The content of secondary structures (%) of the FEYNF-NH<sub>2</sub> revealed from FTIR spectrum analysis.

| Peak no. | Structure                        | Wavenumber (cm <sup>-1</sup> ) | Relative intensity (%) <sup>*</sup> |
|----------|----------------------------------|--------------------------------|-------------------------------------|
| 1        | Antiparallel $\beta$ -sheet      | 1694                           | 3.12                                |
| 2        | $\beta$ -turns                   | 1672                           | 16.12                               |
| 3        | $\alpha$ -helix                  | 1657                           | 28.01                               |
| 4        | $\beta$ -sheet                   | 1633                           | 34.53                               |
| 5        | $\beta$ -sheet aggregate strands | 1613                           | 10.56                               |
| 6        | Side chain                       | 1596                           | 7.65                                |

<sup>\*</sup> The relative intensity indicates the proportion of a component band in the total integrated area of the Amide I region.

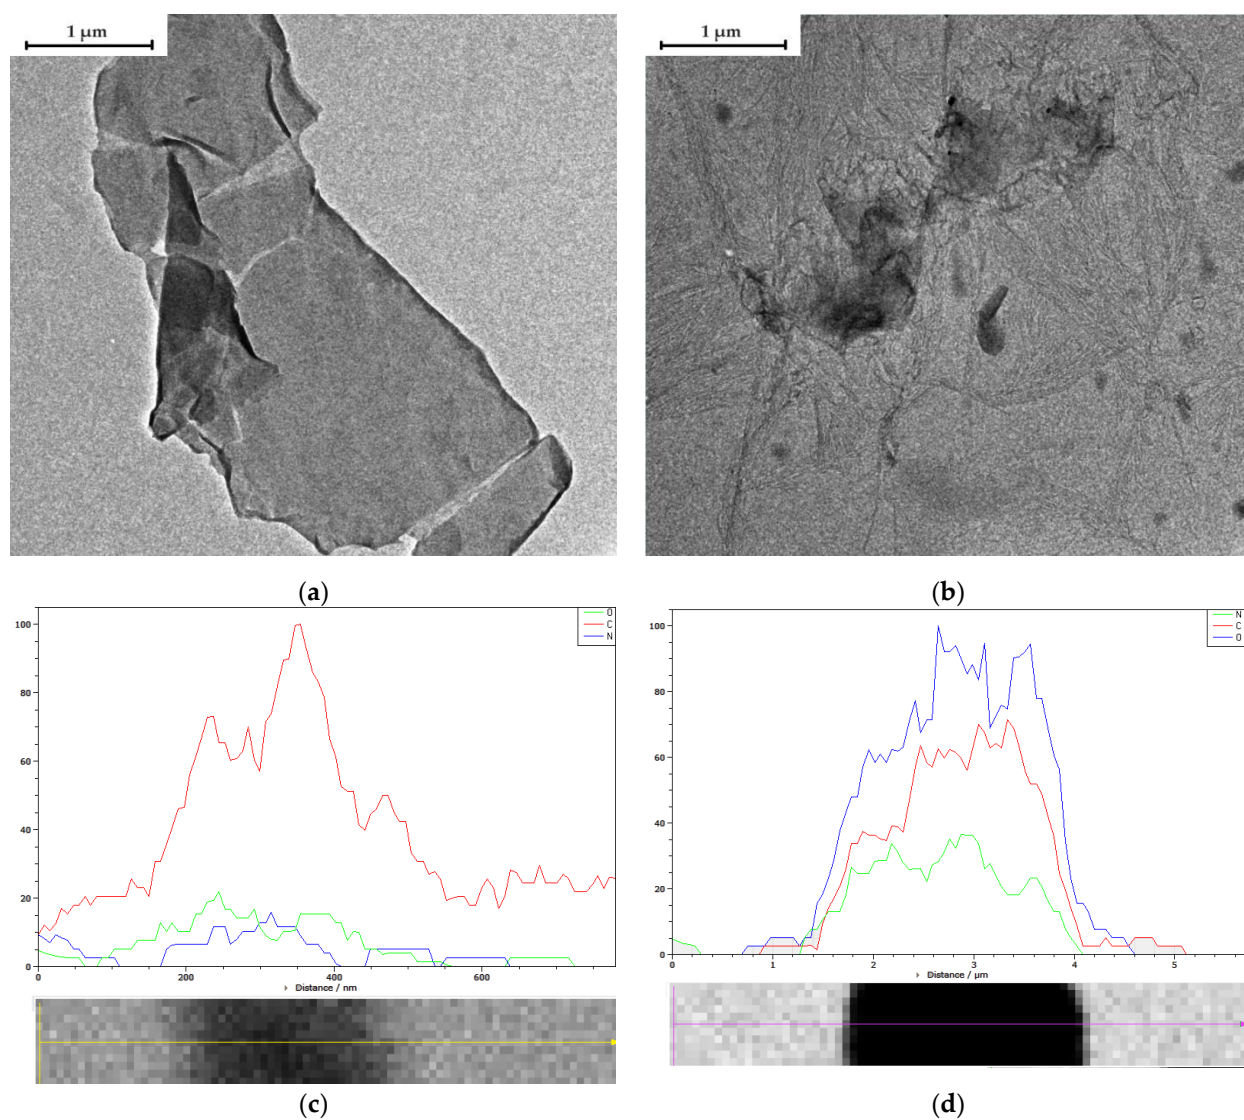

**Figure S5.** TEM images of FEYNF-NH<sub>2</sub> before (a) and after 20 h of incubation at physiological pH of 7.4 and a temperature of 37 °C; EDX spectra for FEYNF peptide sample before (c) and after incubation (d);

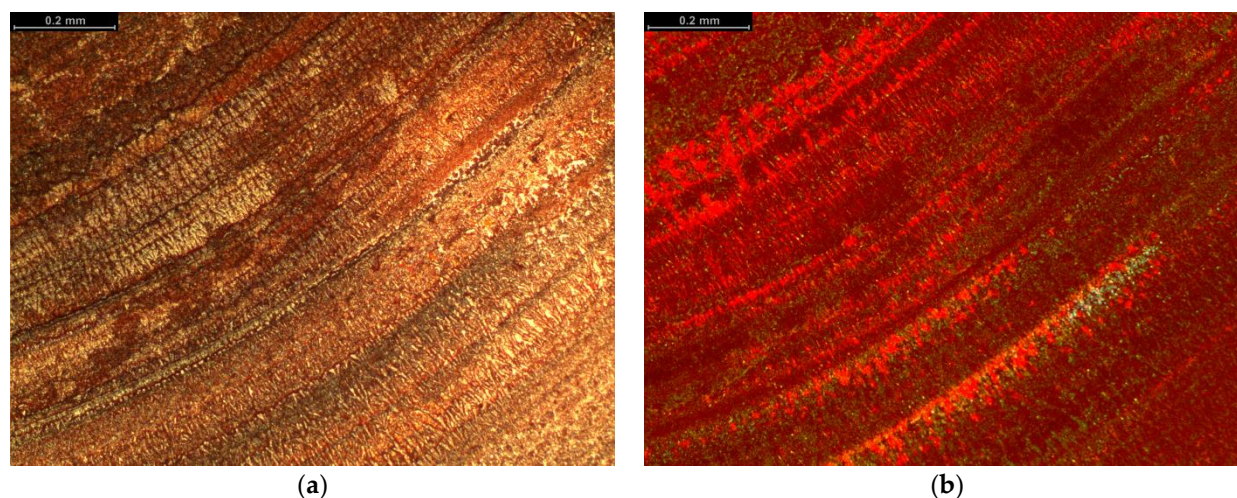

**Figure S6.** Microscopic images of FEYNF-NH<sub>2</sub> sample after Congo red staining captured under two polarization angles: 0 degrees (a), and 90 degrees (b).

**Table S2.** Representative clusters of the docking simulation for the FEYNF@FEYNF dimer complex, highlighting the amino acid residues involved in the peptide–peptide interaction, binding energy ( $E_b$ ) and dissociation constant ( $K_d$ ) values

| Cluster | Binding energy,<br>( $E_b$ , kcal/mol) | Dissociation constant<br>( $K_d$ , $\mu$ m) | Contacting amino acid residue |
|---------|----------------------------------------|---------------------------------------------|-------------------------------|
| 1       | −5.38                                  | 113.87                                      | PHE1 GLU2 TYR3 ASN4 PHE5      |
| 2       | −5.21                                  | 150.69                                      | PHE1 GLU2 TYR3 ASN4 PHE5      |
| 3       | −5.02                                  | 208.01                                      | PHE1 GLU2 TYR3 ASN4 PHE5      |
| 4       | −5.00                                  | 216.98                                      | PHE1 GLU2 TYR3 ASN4 PHE5      |
| 5       | −4.94                                  | 238.89                                      | PHE1 GLU2 TYR3 ASN4 PHE5      |
| 6       | −4.94                                  | 239.70                                      | PHE1 GLU2 TYR3 ASN4 PHE5      |
| 7       | −4.94                                  | 240.92                                      | PHE1 GLU2 TYR3 ASN4 PHE5      |
| 8       | −4.91                                  | 250.45                                      | PHE1 GLU2 TYR3 ASN4 PHE5      |
| 9       | −4.90                                  | 257.31                                      | PHE1 GLU2 TYR3 ASN4           |
| 10      | −4.87                                  | 271.59                                      | PHE1 GLU2 TYR3 ASN4 PHE5      |
| 11      | −4.81                                  | 300.53                                      | PHE1 GLU2 TYR3 ASN4 PHE5      |

**Table S3.** Intermolecular and intramolecular interactions occurring in the FEYNF@FEYNF dimer complex, with corresponding amino acid residues involved.

| Interaction type | Ligand amino acid residue | Receptor amino acid residue |
|------------------|---------------------------|-----------------------------|
| H-bonds          | PHE1 (O)                  | GLU2 (N-H)                  |

|                             | N4 (O)(<br>- | GLU2 (O-H)<br>TYR3 (O)...ASN4 (N-H)<br>(intramolecular) |
|-----------------------------|--------------|---------------------------------------------------------|
| Hydrophobic<br>interactions | PHE1         | PHE1                                                    |
|                             | PHE1         | TYR3                                                    |
|                             | GLU2         | GLU2                                                    |
|                             | TYR3         | TYR3                                                    |
|                             | TYR3         | PHE5                                                    |
|                             | PHE5         | ASN4                                                    |
|                             | PHE5         | PHE5                                                    |
| $\pi$ - $\pi$ stacking      | PHE1         | PHE1                                                    |
|                             | TYR3         | TYR3                                                    |
|                             | TYR3         | PHE5                                                    |
|                             | PHE5         | PHE5                                                    |

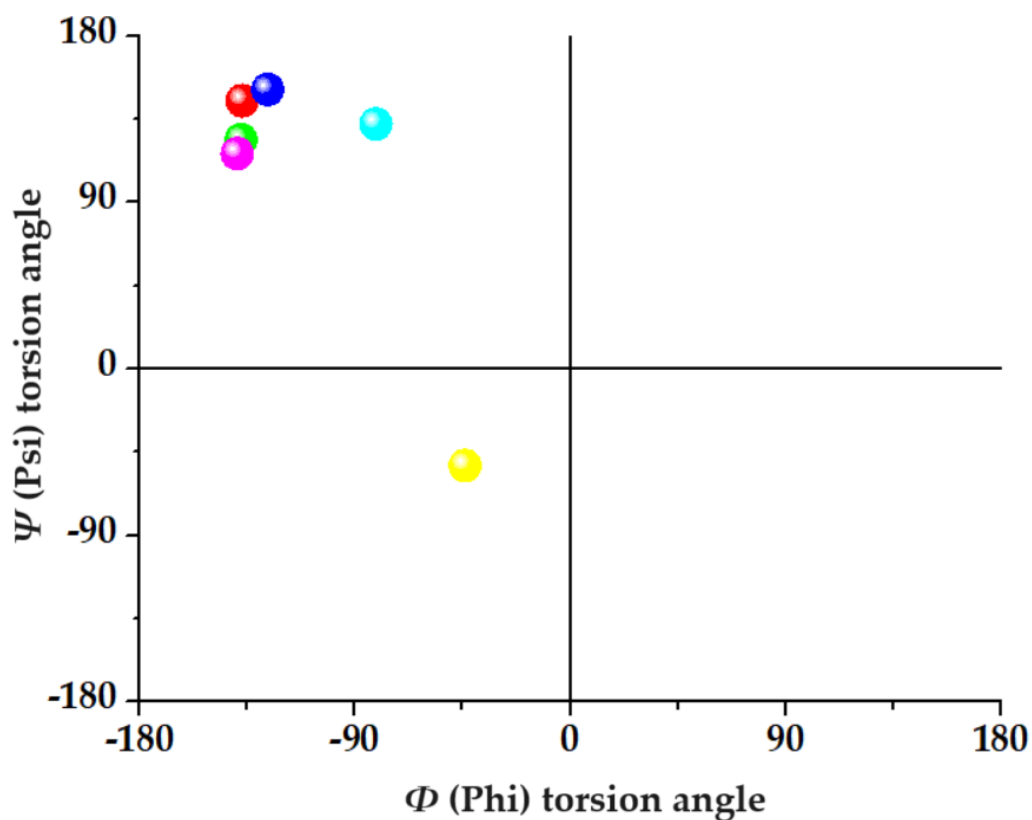

**Figure S7.** Graphical representation of  $(\Phi_i, \Psi_i)$  plot (Chain 1:  $(\Phi_1, \Psi_1)$  – red,  $(\Phi_2, \Psi_2)$  – green,  $(\Phi_3, \Psi_3)$  – blue; Chain 2:  $(\Phi_4, \Psi_4)$  –cyan,  $(\Phi_5, \Psi_5)$  – magenta,  $(\Phi_6, \Psi_6)$  – yellow) based on determined torsion angles.



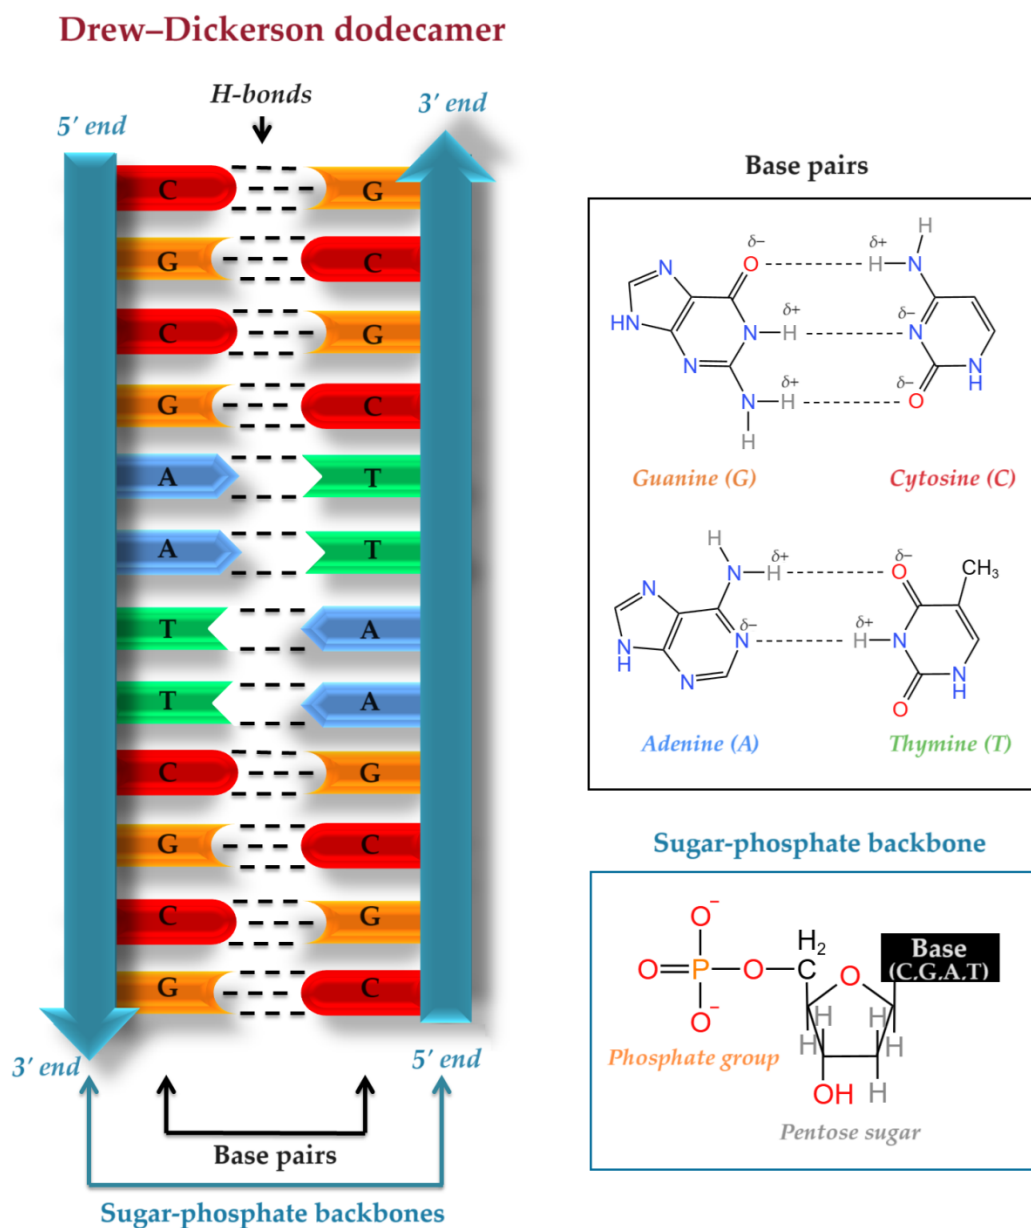

**Figure S8.** Graphical representation of Drew–Dickerson dodecamer sequence (d(CGCGAATTCGCG)<sub>2</sub>) with molecular structures of corresponding nitrogenous bases (C-cytosine, G-guanine, A-adenine, T-thymine) and sugar-phosphate backbone (KingDraw V3.0.2.).

**Table S4.** Representative clusters of the docking simulation for the investigated polyplex (binding energy ( $E_b$ ), dissociation constant ( $K_d$ ) and contacting residues)

| Cluster | Binding energy,<br>( $E_b$ , kcal/mol) | Dissociation constant<br>( $K_d$ , nm) | Contacting receptor residue (nitrogenous base) <sup>1</sup>   |
|---------|----------------------------------------|----------------------------------------|---------------------------------------------------------------|
| 1       | −12.494                                | 0.695                                  | C3(a) G4(a) A5(a) A6(a) T7(a) C3(b) G4(b) A5(b) A6(b) T7(b)   |
| 2       | −12.289                                | 0.982                                  | C3(a) G4(a) A5(a) A6(a) T7(a) C3(b) G4(b) A5(b) A6(b) T7(b)   |
| 3       | −11.656                                | 2.858                                  | C3(a) G4(a) A5(a) A6(a) A5(b) A6(b) T7(b) T8(b) C9(b)         |
| 4       | −11.241                                | 5.758                                  | A5(a) A6(a) T7(a) T8(a) C9(a) C3(b) G4(b) A5(b) A6(b) T7(b)   |
| 5       | −10.964                                | 9.189                                  | C1(a) G2(a) C3(a) G4(a) A5(a) T7(b) T8(b) C9(b) G10(b) C11(b) |
| 6       | −10.908                                | 10.100                                 | C1(a) G2(a) C3(a) G4(a) A5(a) T7(b) T8(b) C9(b) G10(b) C11(b) |
| 7       | −10.868                                | 10.806                                 | T7(a) T8(a) C9(a) G10(a) C1(b) G2(b) C3(b) G4(b) A5(b)        |
| 8       | −10.832                                | 11.483                                 | A6(a) T7(a) T8(a) C3(b) G4(b) A5(b) A6(b)                     |
| 9       | −10.779                                | 12.557                                 | C3(a) G4(a) A5(a) A6(a) T7(a) A5(b) A6(b) T7(b) T8(b)         |
| 10      | −10.754                                | 13.098                                 | A6(a) T7(a) G2(b) C3(b) G4(b) A5(b) A6(b)                     |
| 11      | −10.544                                | 18.670                                 | G4(a) A5(a) A6(a) G4(b) A5(b) A6(b) T7(b)                     |
| 12      | −10.43                                 | 22.631                                 | G4(a) A5(a) A6(a) T7(a) T8(a) C9(a) C3(b) G4(b) A5(b) A6(b)   |

<sup>1</sup> The contact residues are the nitrogenous bases cytosine (C), guanine (G), adenine (A) and Thymine (T); the base residues are found on both sugar-phosphate backbones, referred to as (a) and (b), respectively.



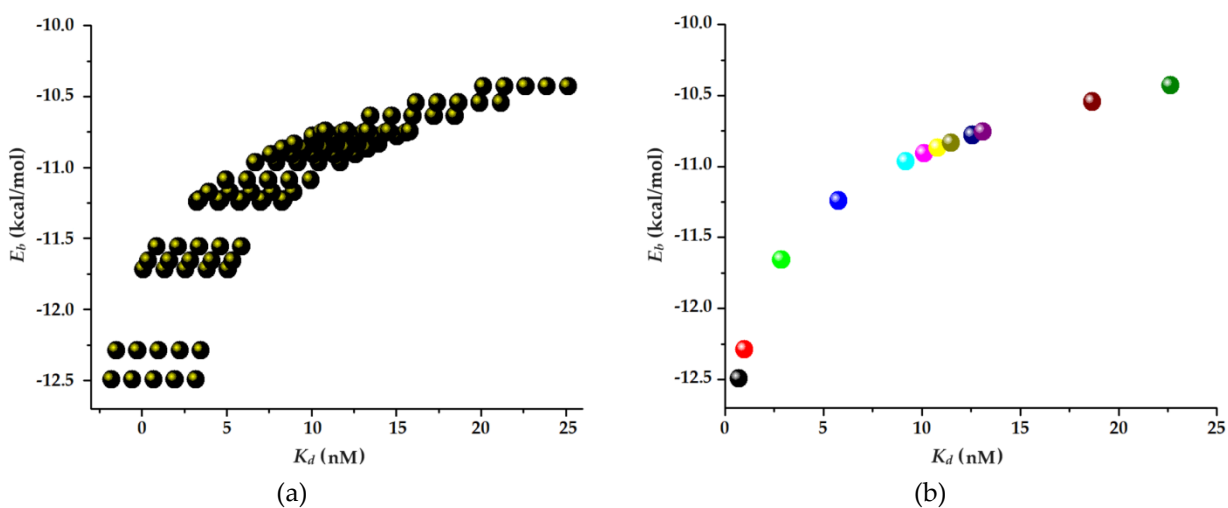

**Figure S9.** Molecular docking outcomes for the polyplex formation: (a) data for all 100-docked poses of polyplex conformation (binding energy vs. dissociation constant); (b) data for the 12 representative clusters (obtained from clustering analysis).
